# Supplementary material for: Occupational and Non-occupational Injuries Can Result in Prolonged Augmentation of Psychiatric Disorders
Source: PubMed Central journal article supplement (PMC8666318; doi:10.2188/jea.je20200374), 2022-01-05
Supplement: je-32-012-s001.pdf [file je-32-012-s001.pdf]

**e Table 1.** The prevalence of different International Classification of Disease (ICD)-9 code of injury (ICD-9-CM codes 800.xx to 999.xx)

| ICD 9 code                                                                             | OI           | Non OI       |
|----------------------------------------------------------------------------------------|--------------|--------------|
|                                                                                        | n (%)        | n (%)        |
| 800-804 Fracture of Skull                                                              | 158 (3.9)    | 61 (1.5)     |
| 805-809 Fracture of Spine and Trunk                                                    | 311 (8.1)    | 62 (1.5)     |
| 810-819 Fracture of Upper Limb                                                         | 1,162 (30.4) | 220 (5.3)    |
| 820-829 Fracture of Lower Limb                                                         | 814 (21.3)   | 150 (3.6)    |
| 830-839 Dislocation                                                                    | 174 (4.6)    | 67 (1.6)     |
| 840-848 Sprains and Strains of Joints and Adjacent Muscles                             | 174 (4.6)    | 261 (6.3)    |
| 850-854 Intracranial Injury, Excluding Those with Skull Fracture                       | 380 (10.0)   | 319 (7.6)    |
| 860-869 Internal Injury of Chest, Abdomen, and Pelvis                                  | 129 (3.4)    | 33 (0.8)     |
| 870-879 Open Wound of Head, Neck, and Trunk                                            | 354 (9.3)    | 656 (15.7)   |
| 880-887 Open Wound of Upper Limb                                                       | 723 (18.9)   | 913 (21.9)   |
| 890-897 Open Wound of Lower Limb                                                       | 231 (6.0)    | 439 (10.5)   |
| 900-904 Injury to Blood Vessels                                                        | 68 (1.8)     | 17 (0.4)     |
| 905-909 Late Effects of Injuries, Poisonings, Toxic Effects, and other External Causes | 93 (2.4)     | 12 (0.3)     |
| 910-919 Superficial Injury                                                             | 300 (7.9)    | 667 (16.0)   |
| 920-924 Contusion with Intact Skin Surface                                             | 403 (10.6)   | 1,105 (26.5) |
| 925-929 Crushing Injury                                                                | 394 (10.3)   | 120 (2.9)    |
| 930-939 Effects of Foreign Body Entering through Orifice                               | 4 (0.1)      | 128 (3.1)    |
| 940-949 Burns                                                                          | 198 (5.2)    | 133 (3.2)    |
| 950-957 Injury to Nerves and Spinal Cord                                               | 150 (3.9)    | 23 (0.6)     |
| 958-959 Certain Traumatic Complications and Unspecified Injuries                       | 168 (4.4)    | 142 (3.4)    |
| 960-979 Poisoning by Drugs, Medicinals and Biological Substances                       | 1 (0.0)      | 16 (0.4)     |
| 980-989 Toxic Effects of Substances Chiefly Nonmedicinal as To Source                  | 7 (0.2)      | 38 (0.9)     |
| 990-995 Other and Unspecified Effects of External Causes                               | 5 (0.1)      | 100 (2.4)    |
| 996-999 Complications of Surgical and Medical Care, Not Elsewhere Classified           | 47 (1.2)     | 18 (0.4)     |

**eTable 2.** Crude hazard ratios of psychiatric disorders in the univariate models using Cox regression

| Variable                    | Any psychiatric disorders | TSRD                | Depressive disorders | Anxiety              | Alcohol and other substance dependence |
|-----------------------------|---------------------------|---------------------|----------------------|----------------------|----------------------------------------|
| HR (95% CI)                 |                           |                     |                      |                      |                                        |
| <b>Group</b>                |                           |                     |                      |                      |                                        |
| NOI with TBI vs. Control    | 1.88 (1.18- 3.00)**       | 1.85 (0.54- 6.33)   | 2.16 (1.24- 3.78)*   | 2.29 (1.23- 4.31)**  | 6.16 (2.02- 18.83)**                   |
| NOI with no TBI vs. Control | 1.69 (1.33- 2.15)***      | 2.20 (1.21- 3.99)** | 1.54 (1.13- 2.09)**  | 1.90 (1.35- 2.68)**  | 4.76 (2.21- 10.23)***                  |
| OI with TBI vs. Control     | 2.32 (1.56- 3.43)**       | 1.96 (0.66- 5.86)   | 2.54 (1.57- 4.10)**  | 1.23 (0.58- 2.59)    | 7.84 (2.94- 20.88)***                  |
| OI with no TBI vs. Control  | 1.88 (1.48- 2.37)***      | 2.47 (1.37- 4.45)** | 1.77 (1.31- 2.40)**  | 2.01 (1.43- 2.83)*** | 3.27 (1.47- 7.28)**                    |

CI, confidence interval; HR, hazard ratio; TSRD, trauma and stress-related disorder.

\*  $p < 0.05$ ; \*\*  $P < 0.01$ , \*\*\*  $p < 0.0001$

\* Traumatic Brain Injury: ICD 9 code: 800-804 Fracture of Skull or 850-854 Intracranial Injury, Excluding Those with Skull Fracture

**eTable 3.** Adjusted hazard ratio of psychiatric disorders in the multivariable models using Cox regression

| Variable                    | Any psychiatric disorders | TSRD                | Depressive disorders | Anxiety             | Alcohol and other substance dependence |
|-----------------------------|---------------------------|---------------------|----------------------|---------------------|----------------------------------------|
| aHR (95% CI)                |                           |                     |                      |                     |                                        |
| Group                       |                           |                     |                      |                     |                                        |
| NOI with TBI vs. Control    | 1.83 (1.14- 2.91)*        | 1.87 (0.54- 6.42)   | 2.02 (1.15- 3.54)*   | 2.22 (1.18- 4.17)*  | 5.94 (1.94- 18.26)**                   |
| NOI with no TBI vs. Control | 1.68 (1.33- 2.13)***      | 2.19 (1.20- 3.97)*  | 1.52 (1.12- 2.06)**  | 1.90 (1.34- 2.67)** | 4.62 (2.14- 9.93)***                   |
| OI with TBI vs. Control     | 2.06 (1.36- 3.10)**       | 1.88 (0.61- 5.81)   | 2.04 (1.23- 3.39)**  | 1.06 (0.49- 2.28)   | 7.44 (2.65- 20.89)**                   |
| OI with no TBI vs. Control  | 1.75 (1.36- 2.26)***      | 2.45 (1.31- 4.59)** | 1.53 (1.10- 2.13)*   | 1.87 (1.29- 2.71)** | 2.82 (1.22- 6.55)*                     |

aHR, hazard ratio mutually adjusted for age at base line, sex, insured premium before the index date, hospitalized period; CI, confidence interval; TSRD, trauma and stress-related disorder.

\*  $p < 0.05$ ; \*\*  $P < 0.01$ , \*\*\*  $p < 0.0001$

\* Traumatic Brain Injury: ICD 9 code: 800-804 Fracture of Skull or 850-854 Intracranial Injury, Excluding Those with Skull Fracture
